# Supplementary material for: Constraining uncertainty in projected precipitation over land with causal discovery
Source: Copernicus journal article supplement (doi:10.5194/esd-16-607-2025), 2025-04-24
Supplement: Supplementary file 1 [file esd-16-607-2025-supplement.zip]

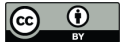

*Supplement of*

## **Constraining uncertainty in projected precipitation over land with causal discovery**

**Kevin Debeire et al.**

*Correspondence to:* Kevin Debeire ([kevin.debeire@dlr.de](mailto:kevin.debeire@dlr.de))

- [esd-16-607-2025-supplement-title-page.pdf](#)
- [supplementary-material](#)
  - [tableS1.csv](#)

The copyright of individual parts of the supplement might differ from the article licence.
